# Supplementary material for: Bone Morphogenetic Protein 13 Has Protumorigenic Effects on Hepatocellular Carcinoma Cells In Vitro
Source: MDPI journal article supplement (doi:10.3390/ijms241311059), 2023-07-04
Supplement: s1 [file s1]

# Supplementary Figure S1

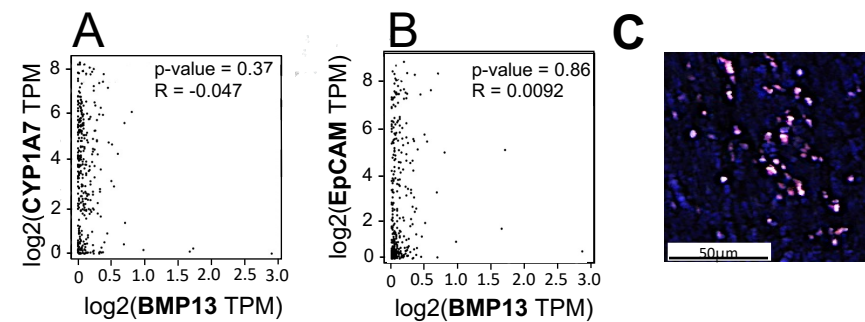

**Figure S1.** Expression of BMP13 in hepatocellular carcinoma (HCC). **(A)** Correlation of BMP13 and CYP7A1 RNA expression levels ( $\log_2(\text{transcript per million})$ ) in 361 human HCC tissues. The cancer genome atlas (TCGA)-derived data were used applying the Gene Expression Profiling Interactive Analysis (GEPIA) database. **(B)** Correlation of BMP13 and epithelial cell adhesion molecule (EpCAM) RNA expression levels ( $\log_2(\text{transcript per million})$ ) in 361 human HCC tissues. GEPIA database was used applying TCGA-derived data. **(C)** Representative image of immunofluorescence staining for BMP13 (red) and  $\alpha\text{-SMA}$  (green) in human HCC tissue section.

# Supplementary Figure S2

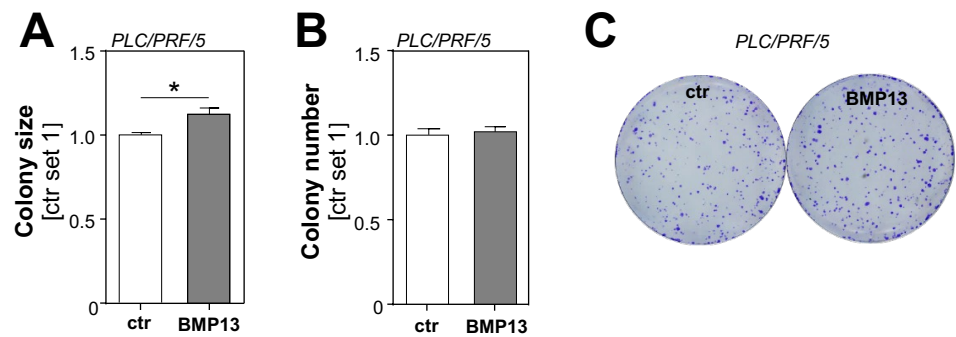

**Figure S2.** Effect of BMP13 on tumorigenicity of HCC cells in vitro. Quantification of **(A)** colony size, **(B)** colony number **(C)** and representative images (1-fold magnification) in anchorage-dependent clonogenic assays with PLC/PRF/5 treated without (ctr) or with rBMP13 for 11 days. Size and number of colonies of control cells have been set as 1 and the effect of BMP13 is shown as relative induction compared to control cells. (\*:  $p < 0.05$ ).

# Supplementary Figure S3

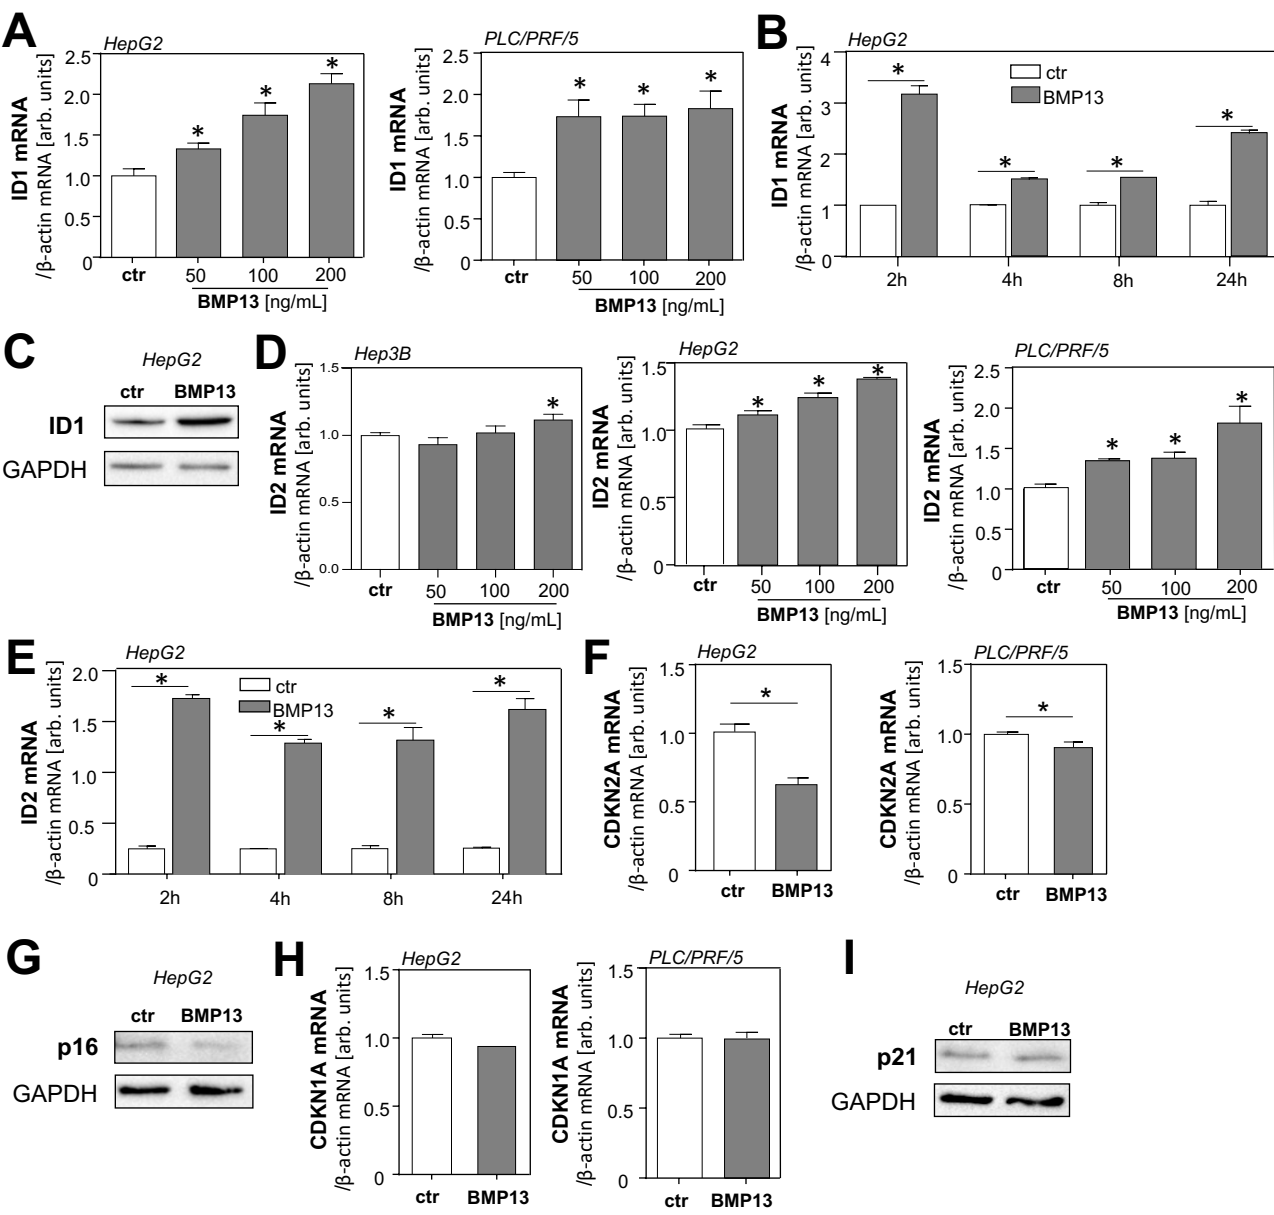

**Figure S3.** Effect of BMP13 on ID1, ID2 and cell-cycle regulators in HCC cells. (A) Analysis of *ID1* mRNA expression in HepG2 and PLC/PRF/5 cells treated with different doses of recombinant BMP13 (rBMP13) for 2 h. (B) Analysis of mRNA expression of *ID1* in HepG2 cells after treatment with rBMP13 (200 ng/mL) for different time points. (C) Western Blot analysis of ID1 expression in rBMP13 (200 ng/mL) treated and HepG2 control cells (ctr) after 24 h. GAPDH was used as a housekeeper. Densitometric analysis (ID1/GAPDH) showed an increased (2.6-fold) staining signal of ID1 in BMP13 treated cells. (D) Analysis of *ID2* mRNA expression in HCC cells treated with different doses of rBMP13 for 2 h. (E) Analysis of mRNA expression of *ID2* in HepG2 cells after treatment with rBMP13 (200 ng/mL) for different time points. (F) Analysis of *CDKN2A* mRNA expression in HepG2 and PLC/PRF/5 stimulated without (ctr) or with rBMP13 (200 ng/mL) for 24 h. (G) Western Blot analysis of p16 protein expression in HepG2 stimulated with rBMP13 for 24 h. GAPDH was used as a housekeeper. Densitometric analysis (p16/GAPDH) showed decreased (0.4-fold) staining signal of p16 in BMP13 treated HepG2. (H) Analysis of *CDKN1A* mRNA expression in HepG2 and PLC/PRF/5 stimulated without (ctr) or with rBMP13 (200 ng/mL) for 24 h. (I) Western Blot analysis of p21 protein expression in HepG2 stimulated with rBMP13 for 24 h. GAPDH was used as a housekeeper. Densitometric analysis (p21/GAPDH) showed no difference of p21 (1.05-fold) staining signal in rBMP13 treated HepG2 cells. (\*:  $p < 0.05$ ).

# Supplementary Figure S4

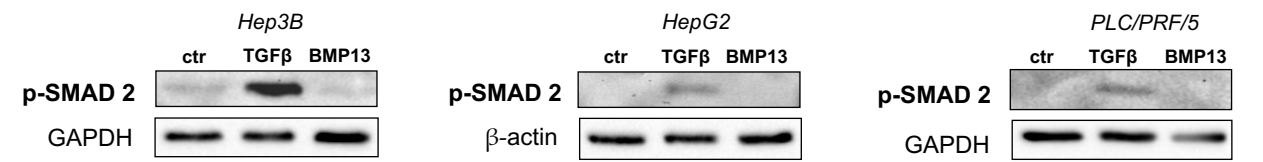

**Figure S4.** Effect of recombinant BMP13 on HCC cells in vitro. Western Blot analysis of phosphorylated SMAD 2 in recombinant BMP13 (200 ng/mL) treated and control cells (ctr). Recombinant transforming growth factor  $\beta$  (TGF $\beta$ ) was used as positive control. GAPDH/ $\beta$ -actin were used as housekeepers. Densitometric analysis (p-SMAD 2/GAPDH) showed an increased (12.6-fold) staining signal of p-SMAD 2 in with recombinant TGF $\beta$  (rTGF $\beta$ ) treated Hep3B but no difference (1.6-fold) staining signal in rBMP13 treated cells compared to control cells (ctr). Densitometric analysis (p-SMAD 2/GAPDH) showed an increased (4.4-fold) staining signal of p-SMAD 2 in rTGF $\beta$  treated HepG2 but no difference (0.5-fold) staining signal in rBMP13 treated cells compared to control cells. Densitometric analysis (p-SMAD 2/GAPDH) showed an increased (1.4-fold) staining signal of p-SMAD 2 in rTGF $\beta$  treated PLC/PRF/5 but no difference (1.1-fold) staining signal in rBMP13 treated cells compared to control cells. The cells were incubated for 20 minutes with the recombinant proteins.

# Supplementary Figure S5

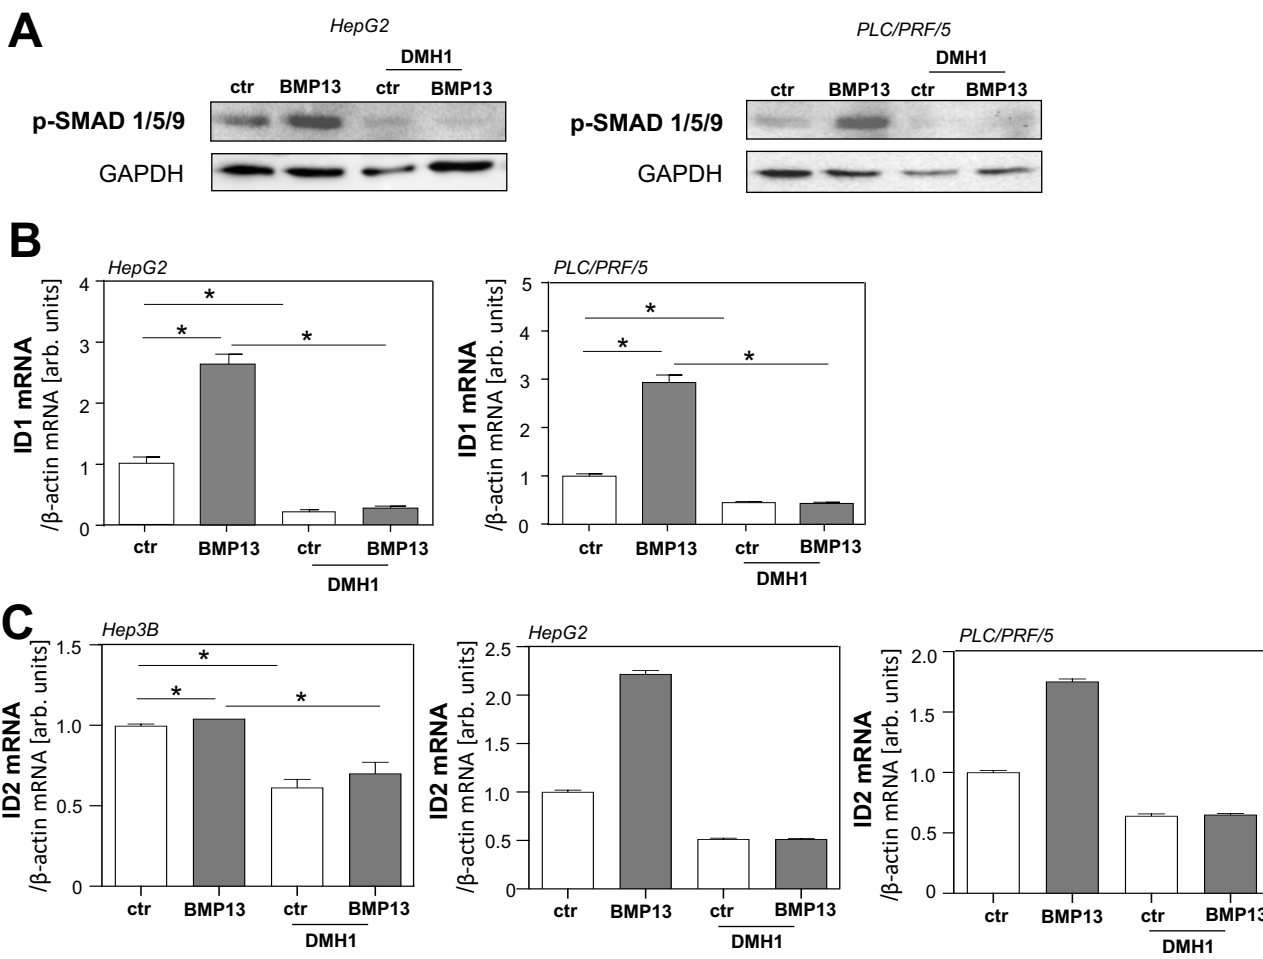

**Figure S5.** Effect of BMP receptor inhibitor dorsomorphin 1 (DMH1) which inhibits ALK2 and ALK3 in HCC cells. (A) Effect of BMP receptor inhibitor DMH1 (10 nM) in HepG2 and PLC/PRF/5 cells on rBMP13 (200 ng/mL)-induced phosphorylation of SMAD 1/5/9. Cells were preincubated with DMH1 for 15 minutes before 15 minutes stimulation with rBMP13. Densitometric analysis (p-SMAD 1/5/9 /GAPDH) confirmed that the p-SMAD 1/5/9 signal in HepG2 induced by BMP13 (1.8-fold compared to control) was completely abolished (1.0 compared to control). p-SMAD 1/5/9 signal in PLC/PRF/5 induced by BMP13 (2.6-fold compared to control) was also completely abolished (0.9 compared to control). Effect of DMH1 (10 nM) on rBMP13 (200 ng/mL)-induced (B) *ID1* mRNA expression (C) and *ID2* mRNA expression in HepG2 and PLC/PRF/5. For mRNA expression analysis cells were treated with DMH1 for 20 minutes and then stimulated with rBMP13 for 8 hours. (\*:  $p < 0.05$ ).
